# Supplementary material for: An antibacterial biomimetic adhesive with strong adhesion in both dry and underwater situations
Source: Royal Society of Chemistry journal article supplement (doi:10.1039/d1tb02215f), 2022-01-01
Supplement: d1tb02215f1.pdf [file d1tb02215f1.pdf]

Supplementary Information

**An antibacterial biomimetic adhesive with strong adhesion in both dry and underwater situations**

Lin Li, Haitao Peng, Yan Du, Heng Zheng, Aiping Yang, Guoyu Lv\*, and Hong Li\*

College of Physics, Sichuan University, Chengdu 610065, China

\* Corresponding Authors:

Email: lgy929@126.com (G. Lv), lih2013@scu.edu.cn (H. Li).

Content:

Table S1 – S4 and Figure S1 – S16 (PDF)

Video S1. The sticky DP@TA/Gel adhesive formation after addition DP (MP4)

Video S2. A non-viscous white flocculent gel was formed when without addition DP (MP4)

Video S3. The DP@TA/Gel adhesive exhibited soft structure and high extensibility (MP4)

Video S4. The detachment of the bonded fingers by the DP@TA/Gel adhesive (MP4)

Video S5. The DP@TA/Gel adhesive became into a white sticky adhesive immediately on contacting with water (MP4)

Video S6. The bonded mental sheets with the bonding area of  $10 \times 8 \text{ cm}^2$  can lift the author (about 60 kg) and even support pull-ups (MP4)

Video S7. The adhesive can glue the pigskin immediately underwater without any stimulus (MP4)

**Table S1.** The compositions of adhesives

| <b>Adhesives codes</b> | <b>DP<br/>(mL)</b> | <b>10 w/v% Gel solution<br/>(mL)</b> | <b>20 w/v% TA solution<br/>(mL)</b> |
|------------------------|--------------------|--------------------------------------|-------------------------------------|
| DP0@TA-Gel             | 0                  | 2                                    | 8                                   |
| DP1@TA-Gel             | 1                  | 2                                    | 8                                   |
| DP2@TA-Gel             | 2                  | 2                                    | 8                                   |
| DP3@TA-Gel             | 3                  | 2                                    | 8                                   |
| DP4@TA-Gel             | 4                  | 2                                    | 8                                   |

**Table S2.** The compositions of simulated seawater

| <b>Reagent</b>                       | <b>Concentration (g/L)</b> |
|--------------------------------------|----------------------------|
| NaCl                                 | 25.5                       |
| KCl                                  | 0.67                       |
| MgCl <sub>2</sub> •6H <sub>2</sub> O | 4.7                        |
| MgSO <sub>4</sub>                    | 6.3                        |
| CaCl <sub>2</sub>                    | 1.35                       |
| NaHCO <sub>3</sub>                   | 0.18                       |

**Table S3.** The atom percent of element on the adhesive surface obtained from EDS analysis after immersing different time

| Element | 0 h    | 0.5 h  | 12 h   |
|---------|--------|--------|--------|
| C       | 57.56% | 56.87% | 56.03% |
| N       | 1.64%  | 3.37%  | 8.17%  |
| O       | 40.79% | 39.76% | 35.80% |

**Table S4.** The proportion of C–OH and C=O on the adhesive surface after immersing in water for different time

| Group | 0 h    | 0.5 h  | 12 h   |
|-------|--------|--------|--------|
| C–OH  | 51.78% | 48.49% | 36.28% |
| C=O   | 9.54%  | 16.43% | 20.26% |

The calculations to assess the proportion of C–OH and C=O on the adhesive surface were performed according to the values from the peak fits of high-resolution XPS C1s spectra below.

C–OH:

$$0\text{h: } 6639.18 / (4959.17 + 6639.18 + 1223.09) = 51.78\%$$

$$0.5\text{h: } 11213.11 / (8114.52 + 11213.11 + 3798.61) = 48.49\%$$

$$12\text{h: } 11481.38 / (13754.73 + 11481.38 + 6412.03) = 36.28\%$$

C=O:

$$0\text{h: } 1223.09 / (4959.17 + 6639.18 + 1223.09) = 9.54\%$$

$$0.5\text{h: } 3798.61 / (8114.52 + 11213.11 + 3798.61) = 16.43\%$$

$$12\text{h: } 6412.03 / (13754.73 + 11481.38 + 6412.03) = 20.26\%$$

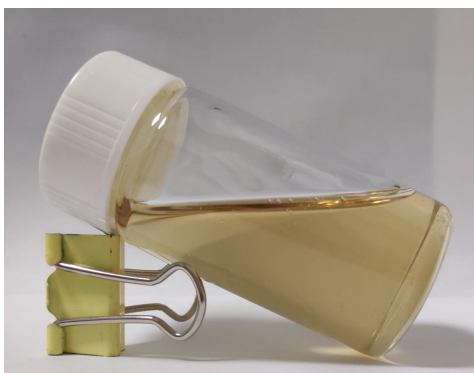

**Figure S1.** Appearance of DP.

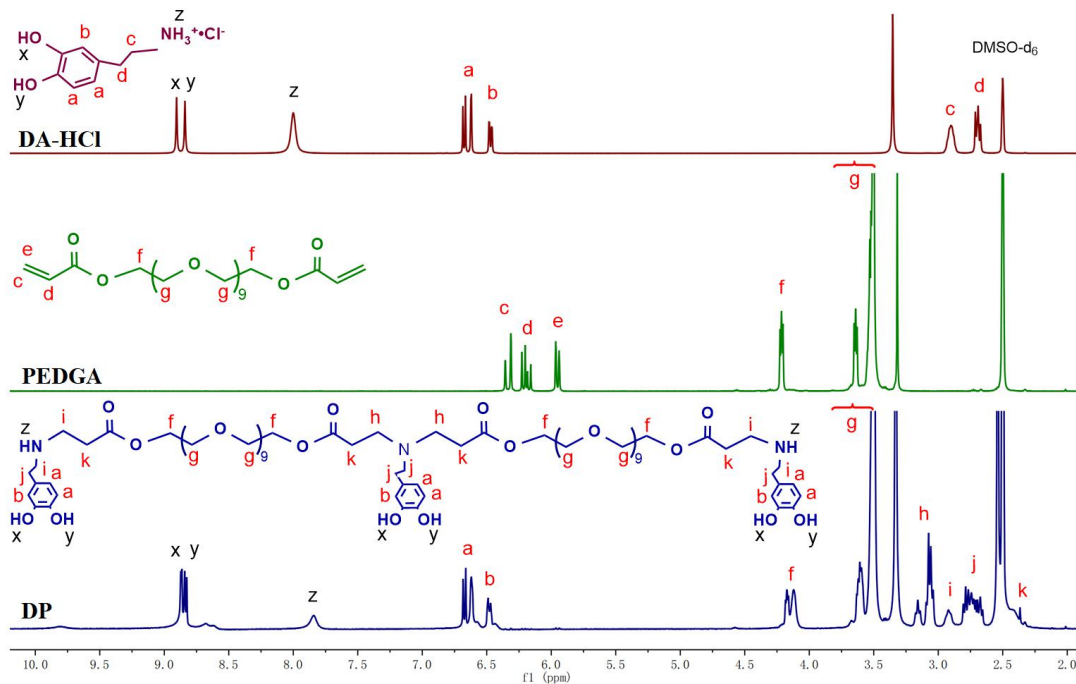

**Figure S2.**  $^1\text{H}$  NMR spectra of DA-HCl, PEGDA and DP in  $\text{DMSO-d}_6$ .

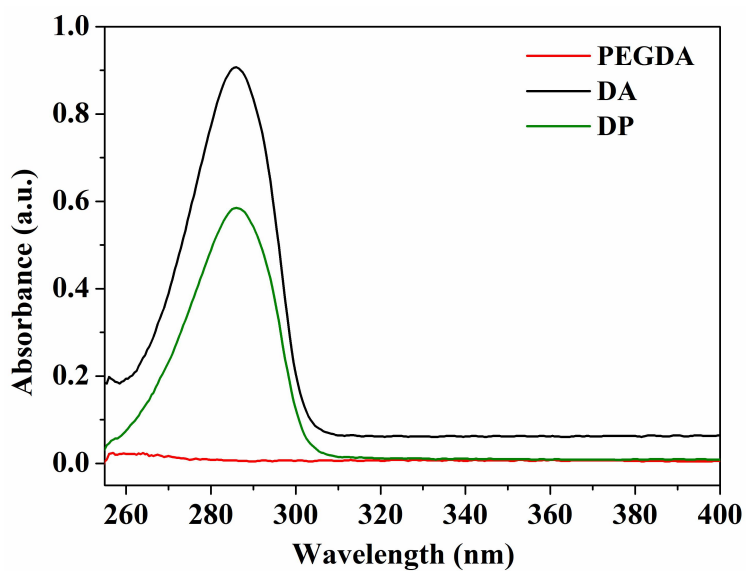

**Figure S3.** The UV-Vis absorption spectra of PEGDA, DA, and DP.

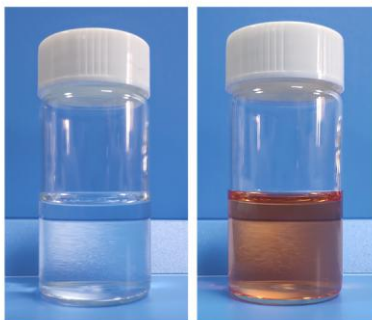

**Figure S4.** The DP solution (0.1 v/v%) without (left)/with (right) addition of NaIO<sub>4</sub>.

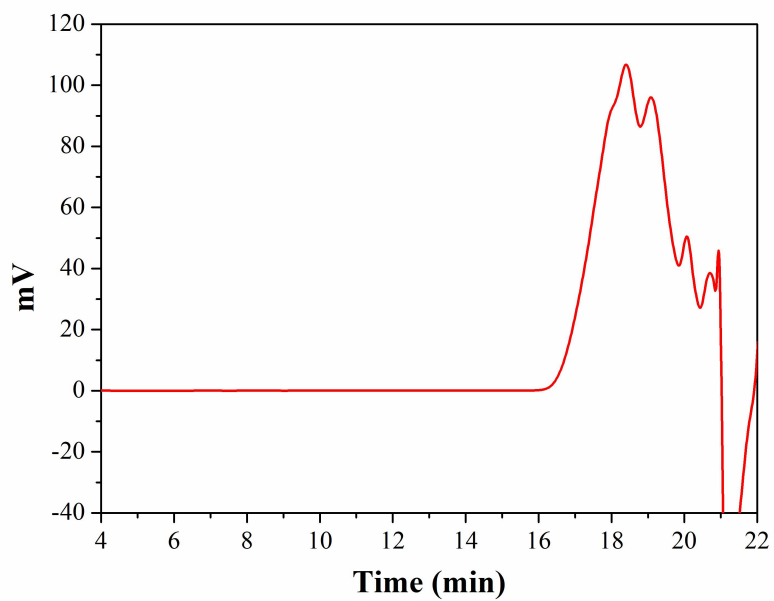

**Figure S5.** The representative GPC traces of DP.

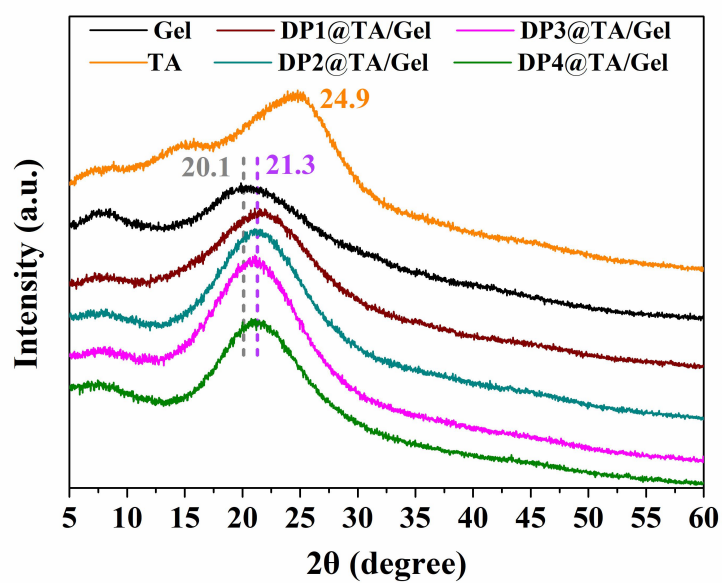

**Figure S6.** The XRD patterns of Gel, TA and DP@TA/Gel adhesives.

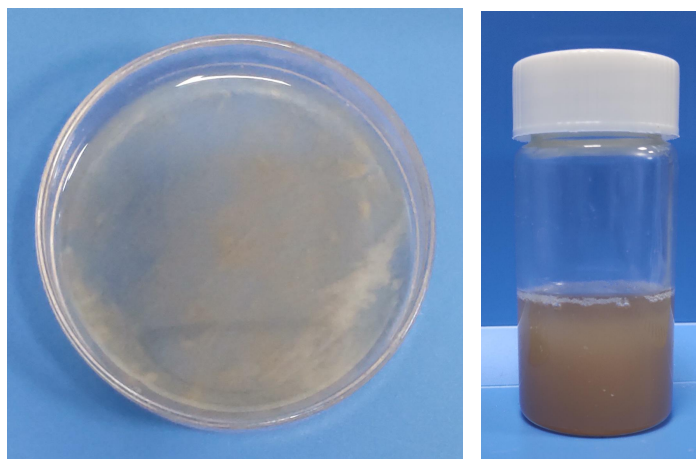

**Figure S7.** DP@TA/Gel adhesives formation was disturbed at the presence of urea.

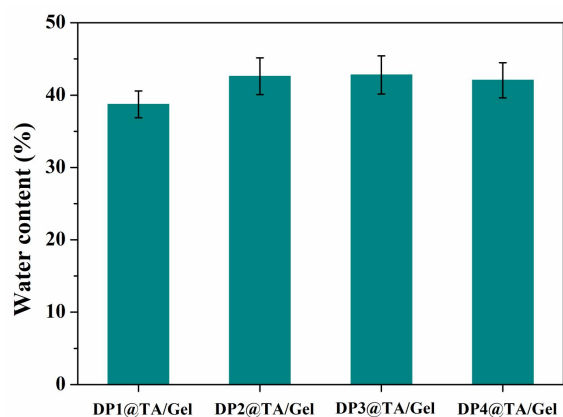

Figure S8. Water content of the DP@TA/Gel adhesives.

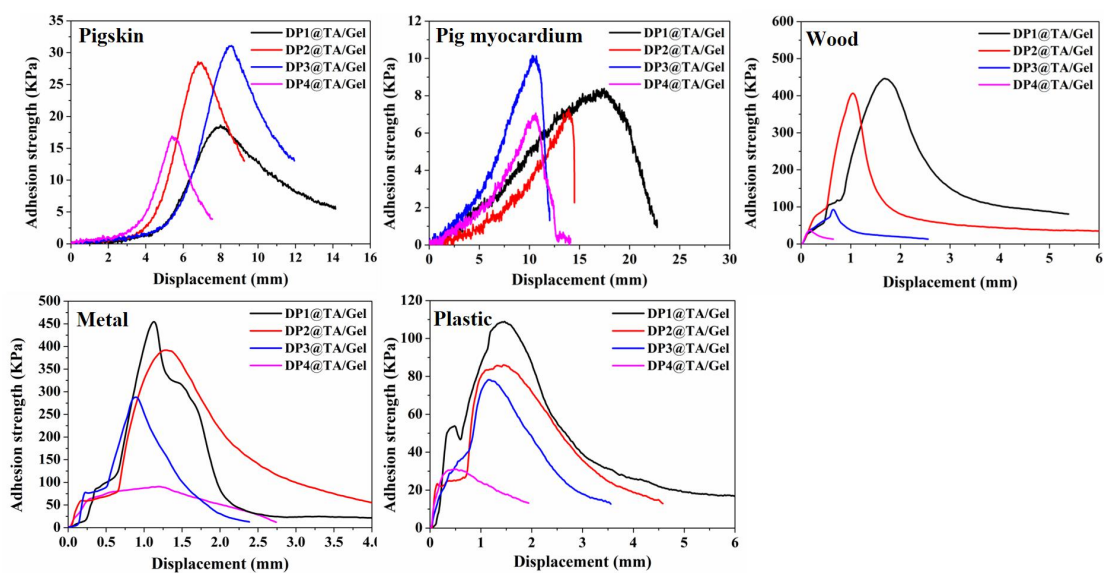

Figure S9. The representative adhesion curves of the adhesives on different substrates.



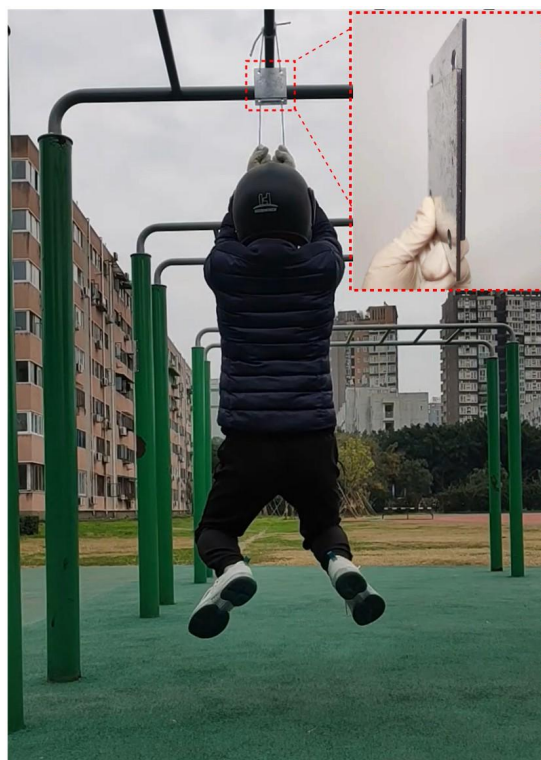

**Figure S10.** The bonded metal sheets with the bonding area of  $10 \times 8 \text{ cm}^2$  can lift the author (60 kg) and even support pull-ups.

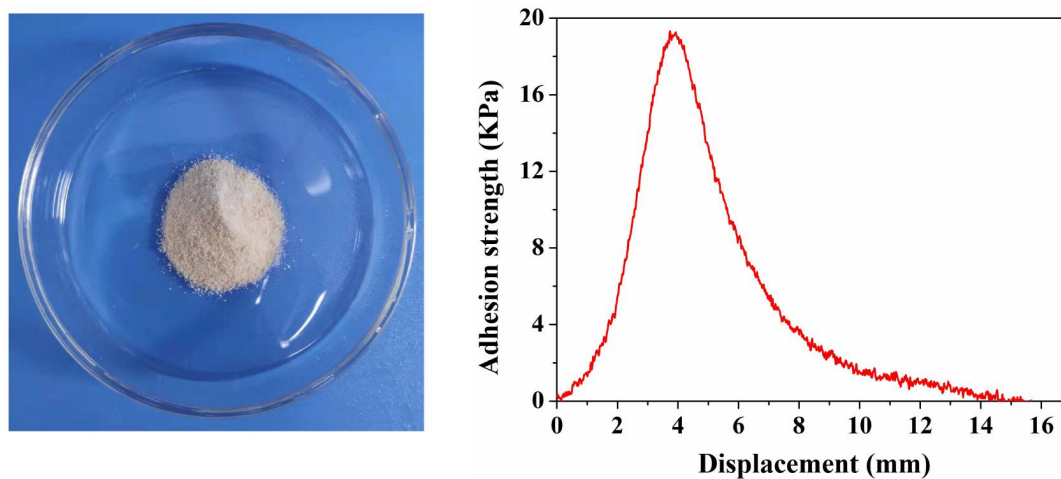

**Figure S11.** Photograph of the powder of the lyophilized adhesive (left) and the representative adhesion curve of the recovered adhesive on pigskin (right). The adhesion strength on pigskin was  $18.19 \pm 1.9 \text{ kPa}$ .

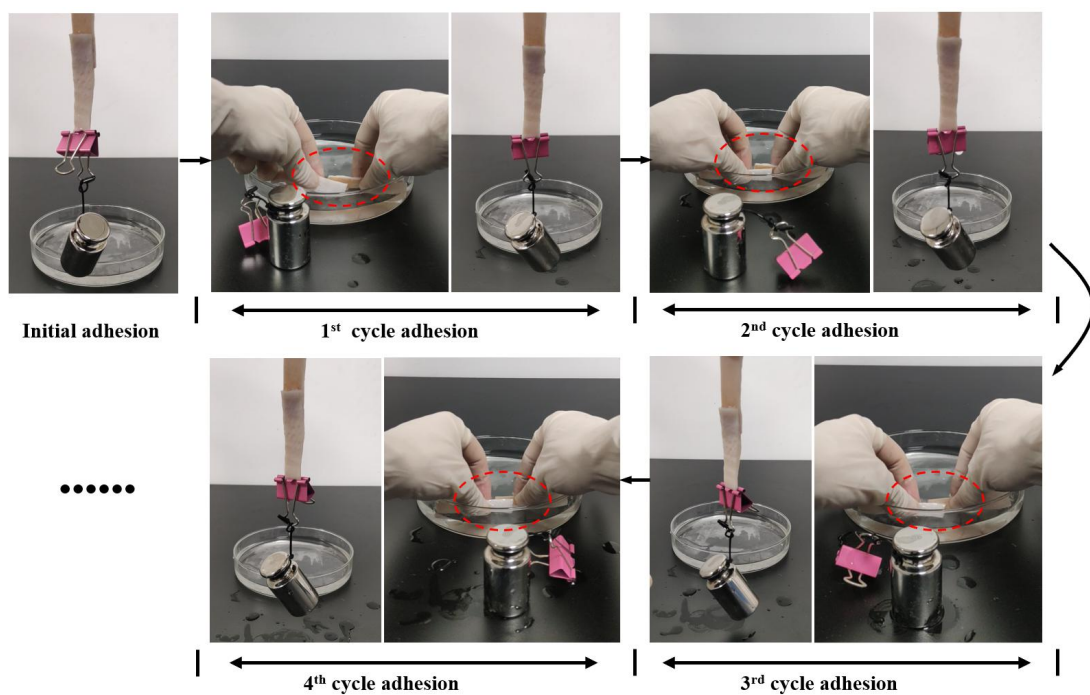

**Figure S12.** The repeatable adhesion performance of the DP@TA/Gel adhesive on pigskin underwater.

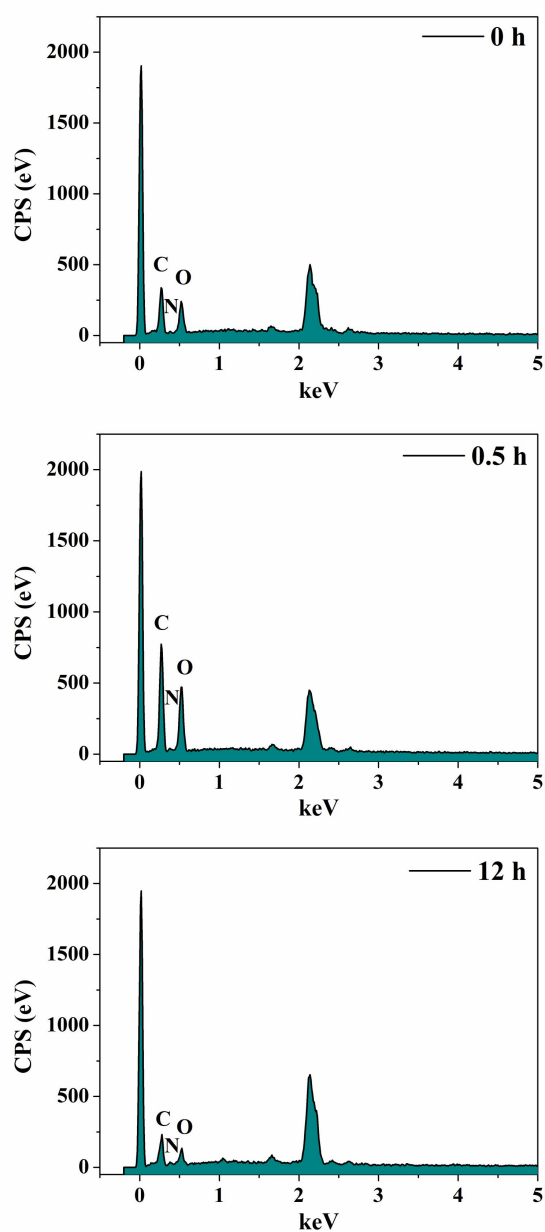

**Figure S13.** The EDS of the adhesive after immersing underwater for different time.

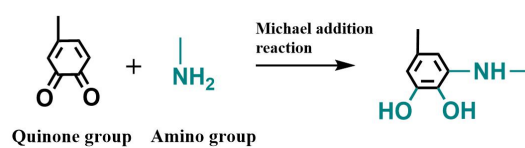

**Figure S14.** The Michael addition reaction between the quinone and amino groups.

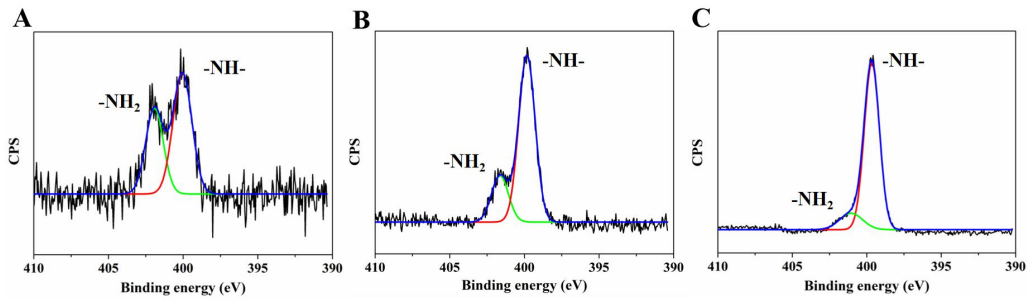

**Figure S15.** Peak-fitting XPS spectra in the N1s regions of the adhesive after immersing in water for (A) 0 min, (B) 30 min and (C) 12 h.

The calculations to assess the proportion of  $\text{-NH}_2$  of the adhesive were performed according to the values from the peak fits of high-resolution XPS N1s spectra below.

immersing in water for 0 min:  $285.71/(285.71+430.43) = 39.90\%$

immersing in water for 30 min:  $562.53/(562.53+1964.85) = 22.26\%$

immersing in water for 12 h:  $931.28/(931.28+6231.39) = 13.00\%$

The degree of the cross-linking of the DP@TA/Gel adhesive:

$$D_{(0.5)} = (39.90\% - 22.26\%) / 39.90\% = 44.21\%$$

$$D_{(12)} = (39.90\% - 13.00\%) / 39.90\% = 67.42\%$$

Where the  $D_{(0.5)}$  and  $D_{(12)}$  represented the degree of the cross-linking of the DP@TA/Gel adhesive after immersing in water for 30 min and 12 h.

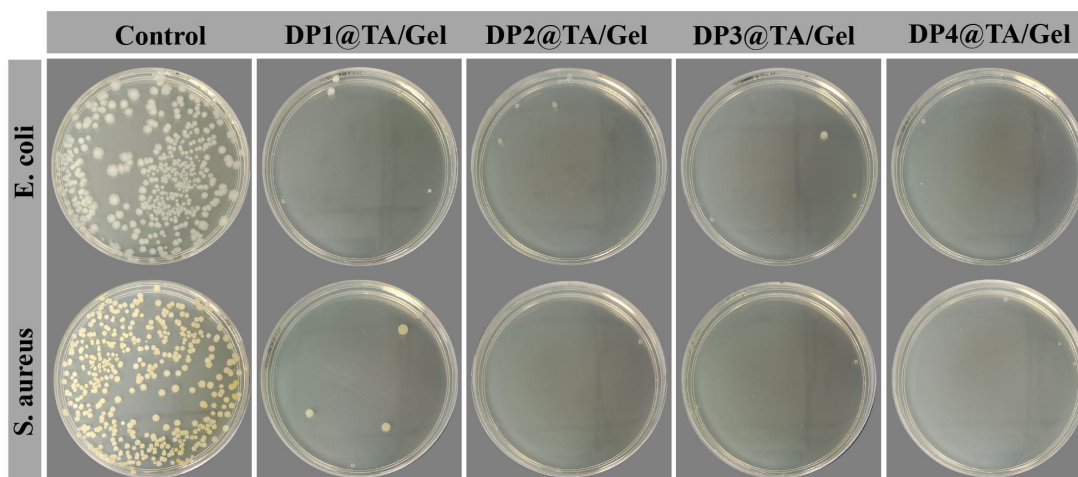

**Figure S16.** Photographs of the bacterial colonies on agar after incubation for 48 h.

### Supplementary Videos:

**Video S1.** The sticky DP@TA/Gel adhesive formation after addition DP.

**Video S2.** A non-viscous white flocculent gel was formed when without addition DP.

**Video S3.** The DP@TA/Gel adhesive exhibited soft structure and high extensibility.

**Video S4.** The detachment of the bonded fingers by the DP@TA/Gel adhesive.

**Video S5.** The DP@TA/Gel adhesive became into a white sticky adhesive immediately on contacting with water.

**Video S6.** The bonded mental sheets with the bonding area of  $10 \times 8 \text{ cm}^2$  can lift the author (about 60 kg) and even support pull-ups.

**Video S7.** The adhesive can glue the pigskin immediately underwater without any stimulus.
